# Supplementary material
Source: HighWire-hosted journal article supplement (https://erj.ersjournals.com/highwire/filestream/113394/field_highwire_adjunct_files/0/Figura_online.pdf)

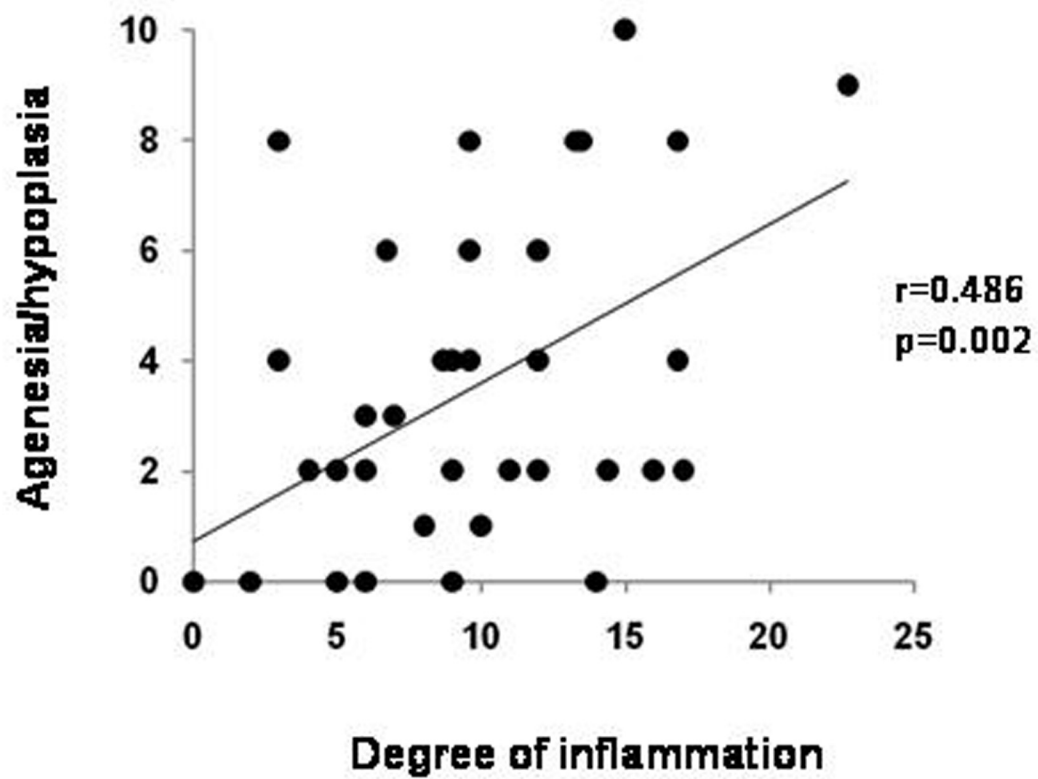

Supplement: Figura_online.pdf [file Figura_online.pdf]
